# Supplementary material for: Role of Purified Anthocyanins in Improving Cardiometabolic Risk Factors in Chinese Men and Women with Prediabetes or Early Untreated Diabetes—A Randomized Controlled Trial
Source: MDPI journal article supplement (doi:10.3390/nu9101104), 2017-10-10
Supplement: s1 [file s1]

The Medox and placebo capsules were similar and processed and packaged at the Biolink Group's own processing factory in Sandnes, Norway. Medox is a veg-encapsulated anthocyanin extract from wild Norwegian bilberries (*Vaccinium myrtillus*) and black currants (*Ribes nigrum*). The anthocyanin capsules also contained pullulan, maltodextrin, and citric acid (which occupied for 4% per capsule and was helpful to maintain stability of anthocyanins), whereas the placebo capsules only contained pullulan and maltodextrin. The specific ingredients of anthocyanins capsules are shown in Supplemental Table S1.

**Supplemental Table S1** The composition of anthocyanins capsules

| Components                                   | Content |
|----------------------------------------------|---------|
| Bilberry ( <i>Vaccinium myrtillus</i> ) skin | 45-52%  |
| Blackcurrant ( <i>Ribes nigrum</i> ) skin    | 12-13%  |
| Pullulan                                     | 20-28%  |
| Maltodextrin                                 | 11-12%  |
| Citric acid                                  | 3-4%    |

European bilberry and black currant are rich in a variety of anthocyanins, mainly concentrated in the peel. According to literatures, bilberry contains 15 kinds of natural anthocyanins; blackcurrant contains 4 kinds of natural anthocyanins, the composition detailed in Table S2. The total amount of anthocyanins in each capsule is 80mg, which is a mixture of 3-*O*-rutinosides of cyanidin and delphinidin, and 3-*O*-b-galactosides, 3-*O*-b-glucosides, and 3-*O*-b-arabinosides of cyanidin, peonidin, delphinidin, petunidin, and malvidin. The relative contents of various anthocyanins are shown in Table S3.

**Supplemental Table S2** The anthocyanins contained in *Vaccinium myrtillus* and *Ribes nigrum*

| No                         | Anthocyanins                                    | Abbreviations |
|----------------------------|-------------------------------------------------|---------------|
| <i>Vaccinium myrtillus</i> |                                                 |               |
| 1                          | Delphinidin 3- <i>O</i> - $\beta$ -glucosides   | Dp-3-G        |
| 2                          | Delphinidin 3- <i>O</i> - $\beta$ -galactosides | Dp-3-gal      |
| 3                          | Delphinidin 3- <i>O</i> - $\beta$ -arabinosides | Dp-3-A        |
| 4                          | Cyanidin 3- <i>O</i> - $\beta$ -glucosides      | Cy-3-G        |

|              |                                      |          |
|--------------|--------------------------------------|----------|
| 5            | Cyanidin 3-O- $\beta$ -galactosides  | Cy-3-gal |
| 6            | Cyanidin 3-O- $\beta$ -arabinosides  | Cy-3-A   |
| 7            | Petunidin 3-O- $\beta$ -glucosides   | Pe-3-G   |
| 8            | Petunidin 3-O- $\beta$ -galactosides | Pe-3-gal |
| 9            | Petunidin 3-O- $\beta$ -arabinosides | Pe-3-A   |
| 10           | Peonidin 3-O- $\beta$ -glucosides    | Pn-3-G   |
| 11           | Peonidin 3-O- $\beta$ -galactosides  | Pn-3-gal |
| 12           | Peonidin 3-O- $\beta$ -arabinosides  | Pn-3-A   |
| 13           | Malvidin 3-O- $\beta$ -glucosides    | Mv-3-G   |
| 14           | Malvidin 3-O- $\beta$ -galactosides  | Mv-3-gal |
| 15           | Malvidin 3-O- $\beta$ -arabinosides  | Mv-3-A   |
| <hr/>        |                                      |          |
| Ribes nigrum |                                      |          |
| 1            | Delphinidin 3-O- $\beta$ -glucosides | Dp-3-G   |
| 2            | Cyanidin 3-O- $\beta$ -glucosides    | Cy-3-G   |
| 3            | Delphinidin 3-O-rutinoside           | Dp-3-R   |
| 4            | Cyanidin 3-O-rutinoside              | Cy-3-R   |

---

Supplemental Table S3 The relative contents of anthocyanins in Medox capsules

| Anthocyanins             | Content(%) |
|--------------------------|------------|
| Dp-3-G, Dp-3-gal, Dp-3-A | 58.0       |
| Cy-3-G, Cy-3-gal, Cy-3-A | 33.0       |
| Mv-3-G, Mv-3-gal, Mv-3-A | 3.0        |
| Pe-3-G, Pe-3-gal, Pe-3-A | 2.5        |
| Pn-3-G, Pn-3-gal, Pn-3-A | 2.5        |
| Dp-3-R, Cy-3-R           | 1.0        |
| Total                    | 100.0      |

**Supplemental Table S4 Changes in anthropometrics and blood pressure at baseline and after 12-week treatment by ITT analysis**

| Parameters      | Anthocyanins(n=80) |               | Placebo(n=80) |              | Net change (CI95%)  | $P_{t\text{-test}}$ | $P_{ANCOVA}$ |
|-----------------|--------------------|---------------|---------------|--------------|---------------------|---------------------|--------------|
|                 | Baseline           | 12 weeks      | Baseline      | 12 weeks     |                     |                     |              |
| Anthropometrics |                    |               |               |              |                     |                     |              |
| Weight(Kg)      | 63.66±11.87        | 62.89±11.71*  | 63.08±10.45   | 62.64±10.52* | -0.33(-0.69, 0.03)  | 0.073               | 0.141        |
| BMI(Kg/m2)      | 24.66±3.18         | 24.33±3.12*   | 24.82±3.44    | 24.60±3.41*  | -0.10(-0.3, 0.09)   | 0.289               | 0.387        |
| Waist(cm)       | 87.8±9.27          | 86.52±8.58*   | 88.02±8.94    | 87.68±9.16   | -0.94(-2.2, 0.31)   | 0.140               | 0.094        |
| WHR             | 0.905±0.054        | 0.896±0.050   | 0.905±0.055   | 0.908±0.053  | -0.01(-0.02, 0.002) | 0.088               | 0.059        |
| NC              | 34.99±3.07         | 35.00±3.28    | 34.96±2.98    | 35.08±3.06   | -0.12(-0.46, 0.22)  | 0.503               | 0.716        |
| Blood pressure  |                    |               |               |              |                     |                     |              |
| SBP(mmHg)       | 133.09±16.50       | 129.93±13.76* | 133±21.18     | 131.48±18.62 | -1.63(-5.31, 2.04)  | 0.381               | 0.400        |
| DBP(mmHg)       | 78.78±9.89         | 76.58±9.00*   | 78.69±9.46    | 76.55±10.63* | -0.07(-2.34, 2.2)   | 0.951               | 0.933        |

*The values are presented as mean ± standard deviation.*

*\*  $P < 0.05$  by paired  $t$ -test with comparison of the difference between baseline and 12 weeks data.*

*$P_{t\text{-test}}$  was the comparison of net changes between the two groups, compared by independent samples  $t$ -test.*

*$P_{ANCOVA}$  was the comparison by analysis of covariates (ANCOVA) adjusting for baseline values (age, sex, medications for lowering blood pressure and lipids).*

*BMI, body mass index, WHR: waist to hip ratio, NC, neck circumference, DBP, diastolic blood pressure, SBP, systolic blood pressure.*

**Supplemental Table S5 Daily dietary intakes of total energy and nutrients at baseline and 12 weeks after treatment.**

| Energy and nutrients | Anthocyanins(n=80) |                | Placebo(n=80)  |                | <i>P<sub>change</sub></i> |
|----------------------|--------------------|----------------|----------------|----------------|---------------------------|
|                      | Baseline           | 12 weeks       | Baseline       | 12 weeks       |                           |
| Total energy(kcal/d) | 1753.39±693.75     | 1763.91±585.49 | 1819.26±687.87 | 1788.71±645.02 | 0.721                     |
| Protein(g/d)         | 107.03±46.29       | 110.85±44.22   | 114.86±57.35   | 113.68±56.06   | 0.567                     |
| Carbohydrates(g/d)   | 271.44±134.05      | 278.03±118.2   | 282.51±105.21  | 270.12±98.68   | 0.332                     |
| Total fat(g/d)       | 51.46±28.8         | 54.15±33.34    | 53.42±31.95    | 59.45±39.91    | 0.579                     |
| Cholesterol(mg/d)    | 265.79±167.56      | 283.31±177.68  | 262.08±143.74  | 297.3±173.79   | 0.553                     |
| Vitamin A (IU/d)     | 503.86±335.1       | 495.27±248.11  | 505.74±257.84  | 505.33±226.7   | 0.856                     |
| Vitamin E (mg/d)     | 19.94±26.01        | 19.57±13.19    | 19.52±18.07    | 20.52±17.62    | 0.712                     |
| Vitamin C (mg/d)     | 60.26±38.98        | 56.78±33.67    | 62.1±34.94     | 58.38±29.96    | 0.966                     |
| Dietary fibers (g/d) | 16.11±10.9         | 15.64±6.1      | 16.52±8.05     | 16.3±7.35      | 0.864                     |
| Anthocyanins (mg/d)  | 10.02±6.63         | 9.88±3.59      | 10.27±4.7      | 9.86±4.09      | 0.756                     |

*Food groups and nutrients were calculated based on 3-day dietary records at baseline and at 12 weeks. P values were the comparisons of net changes between the two groups by independent t-test. The anthocyanins only represent the subjects' daily dietary intakes, not the dose of supplemental capsules provided.*

**Supplemental Table S6** Changes in cardiometabolic parameters after 12-week treatment stratified by baseline fasting glucose levels ( $\geq 5.6$  vs.  $< 5.6$  mmol/L)

|                              | Fasting glucose $\geq 5.6$ mmol/L |                   |              | Fasting glucose $< 5.6$ mmol/L |                    |              |
|------------------------------|-----------------------------------|-------------------|--------------|--------------------------------|--------------------|--------------|
|                              | Anthocyanins(n=60)                | Placebo(n=66)     | $P_{t-test}$ | Anthocyanins(n=20)             | Placebo(n=14)      | $P_{t-test}$ |
| HbA1c (%)                    | -0.30 $\pm$ 0.38*                 | -0.17 $\pm$ 0.24  | 0.018        | -0.26 $\pm$ 0.24               | -0.11 $\pm$ 0.27   | 0.093        |
| Fasting glucose(mmol/L)      | -0.23 $\pm$ 0.83*                 | 0.10 $\pm$ 0.60   | 0.012        | 0.86 $\pm$ 0.83                | 0.37 $\pm$ 0.60    | 0.067        |
| 2-h glucose(mmol/L)          | 0.56 $\pm$ 2.88                   | 0.73 $\pm$ 2.09   | 0.719        | 1.20 $\pm$ 1.98                | -0.19 $\pm$ 2.69   | 0.090        |
| Fasting insulin( $\mu$ U/ml) | -0.61 $\pm$ 5.55                  | -0.41 $\pm$ 3.62  | 0.806        | 0.18 $\pm$ 3.41                | 1.32 $\pm$ 3.59    | 0.355        |
| 2-h insulin( $\mu$ U/ml)     | 8.00 $\pm$ 52.46                  | 19.15 $\pm$ 41.9  | 0.188        | 42.04 $\pm$ 74.62*             | -10.55 $\pm$ 39.65 | 0.022        |
| Fasting C-Peptide(ng/ml)     | -0.09 $\pm$ 0.71                  | 0.00 $\pm$ 0.59   | 0.418        | 0.42 $\pm$ 0.50                | 0.25 $\pm$ 0.50    | 0.354        |
| 2-h C-Peptide(ng/ml)         | 0.27 $\pm$ 2.41*                  | 1.16 $\pm$ 2.33   | 0.037        | 1.35 $\pm$ 3.47                | -0.64 $\pm$ 2.54   | 0.077        |
| AUC <sub>Glucose</sub>       | 1.23 $\pm$ 5.70                   | 1.76 $\pm$ 4.85   | 0.576        | 2.91 $\pm$ 4.24                | 1.28 $\pm$ 4.02    | 0.268        |
| AUC <sub>Insulin</sub>       | 15.99 $\pm$ 101.47                | 28.93 $\pm$ 75.35 | 0.415        | 67.05 $\pm$ 157.89             | 24.43 $\pm$ 135.92 | 0.419        |
| AUC <sub>C-Peptide</sub>     | 0.16 $\pm$ 5.03                   | 1.48 $\pm$ 4.62   | 0.127        | 2.46 $\pm$ 6.92                | -0.36 $\pm$ 7.17   | 0.258        |

|                |             |             |       |              |               |       |
|----------------|-------------|-------------|-------|--------------|---------------|-------|
| HOMA-IR        | -0.26±1.89  | -0.06±1.23  | 0.471 | 0.53±1.16    | 0.56±1.16     | 0.938 |
| HOMA-β         | 0.66±36.30  | -4.93±24.79 | 0.311 | -43.63±52.22 | -25.37±120.09 | 0.549 |
| TC (mmol/L)    | -0.22±1.15  | 0.08±0.93   | 0.117 | 0.16±1.05    | -0.23±0.68    | 0.237 |
| TG (mmol/L)    | 0.20±1.13   | 0.02±0.91   | 0.338 | -0.20±0.61   | 0.69±2.25     | 0.100 |
| HDL-c (mmol/L) | -0.19±0.32  | -0.14±0.21  | 0.388 | -0.14±0.29   | -0.22±0.20    | 0.370 |
| LDL-c (mmol/L) | -0.36±0.69* | -0.07±0.57  | 0.010 | -0.08±0.56   | -0.21±0.25    | 0.408 |
| Apo A-1 (g/L)  | -0.01±0.28  | -0.08±0.24  | 0.108 | 0.06±0.28    | -0.10±0.16    | 0.063 |
| Apo B (g/L)    | -0.08±0.19* | 0.01±0.18   | 0.006 | -0.06±0.17   | -0.09±0.15    | 0.651 |

Data are presented as mean ± standard deviation.

\* $P < 0.05$  by independent samples *t*-test with comparison of the difference of net changes between the two groups.

HOMA-IR, homoeostasis model assessment of insulin resistance; HOMA-β, homoeostasis model assessment of β-cell function; AUC, area under the curve of 3-hour oral glucose tolerance test, were calculated according the trapezoidal rule; TC, Total cholesterol; TG, Triglycerides; HDL-c, high-density lipoprotein cholesterol; LDL-c, low-density lipoprotein cholesterol.

**Supplemental Table S7 Changes of cardiometabolic parameters after 12-week treatment stratified by baseline triglycerides (≥1.7 vs. <1.7 mmol/L)**

|                         | TG≥1.7 mmol/L      |               |                           | TG<1.7 mmol/L      |               |                           |
|-------------------------|--------------------|---------------|---------------------------|--------------------|---------------|---------------------------|
|                         | Anthocyanins(n=28) | Placebo(n=29) | <i>P<sub>t-test</sub></i> | Anthocyanins(n=52) | Placebo(n=51) | <i>P<sub>t-test</sub></i> |
| HbA1c (%)               | -0.38±0.37*        | -0.17±0.23    | 0.010                     | -0.24±0.33         | -0.15±0.26    | 0.105                     |
| Fasting glucose(mmol/L) | 0.11±0.92          | 0.14±0.7      | 0.888                     | 0±0.98             | 0.15±0.55     | 0.352                     |
| 2-h glucose(mmol/L)     | 0.4±2.81           | 1.29±1.83     | 0.161                     | 0.9±2.63           | 0.15±2.33     | 0.132                     |
| Fasting insulin(μU/ml)  | -1.97±5.7          | -0.2±3.44     | 0.166                     | 0.42±4.57          | -0.05±3.8     | 0.569                     |
| 2-h insulin(μU/ml)      | 7.54±67.49         | 32.52±49.31   | 0.115                     | 21.34±55.86        | 3.39±34.91    | 0.054                     |

|                          |              |             |       |              |              |       |
|--------------------------|--------------|-------------|-------|--------------|--------------|-------|
| Fasting C-Peptide(ng/ml) | -0.3±0.73*   | 0.08±0.62   | 0.035 | 0.22±0.61    | 0.03±0.57    | 0.1   |
| 2-h C-Peptide(ng/ml)     | 0.21±2.97*   | 1.83±2.43   | 0.028 | 0.71±2.61    | 0.28±2.3     | 0.38  |
| AUC <sub>Glucose</sub>   | 0.43±5.76    | 3.09±5.26   | 0.073 | 2.31±5.12    | 0.87±4.18    | 0.12  |
| AUC <sub>Insulin</sub>   | -1.4±105.88* | 50.31±84.44 | 0.046 | 44.99±123.54 | 15.54±88.03  | 0.167 |
| AUC <sub>C-Peptide</sub> | -0.79±5.03*  | 2.48±4.6    | 0.013 | 1.56±5.77    | 0.41±5.34    | 0.297 |
| HOMA-IR                  | -0.6±1.99    | 0.03±1.19   | 0.155 | 0.22±1.58    | 0.06±1.27    | 0.574 |
| HOMA-β                   | -10.26±43.43 | -4.2±27.86  | 0.531 | -10.49±46.03 | -10.95±64.76 | 0.967 |
| TC (mmol/L)              | -0.12±1.17   | 0.08±0.86   | 0.468 | -0.12±1.12   | 0±0.92       | 0.553 |
| TG (mmol/L)              | -0.09±1.44   | -0.11±1.21  | 0.936 | 0.2±0.72     | 0.28±1.28    | 0.67  |
| HDL-c (mmol/L)           | -0.1±0.43    | -0.13±0.21  | 0.754 | -0.21±0.22   | -0.17±0.22   | 0.358 |
| LDL-c (mmol/L)           | -0.26±0.63   | -0.15±0.43  | 0.458 | -0.31±0.69   | -0.06±0.58   | 0.053 |
| Apo A-1 (g/L)            | 0.08±0.27*   | -0.05±0.23  | 0.06  | -0.03±0.28   | -0.11±0.23   | 0.121 |
| Apo B (g/L)              | -0.05±0.2    | 0.01±0.18   | 0.217 | -0.09±0.18   | -0.02±0.18   | 0.037 |

Data were presented as mean ± standard deviation. Subgroups were stratified by the dyslipidemia standards in China. \* $P<0.05$  by independent samples *t*-test with comparison of the difference of net changes between the two groups. HOMA-IR, homoeostasis model assessment of insulin resistance; HOMA-β, homoeostasis model assessment of β-cell function; AUC, area under the curve of 3-hour oral glucose tolerance test, were calculated according the trapezoidal rule; TC, Total cholesterol; TG, Triglycerides; HDL-c, high-density lipoprotein cholesterol; LDL-c, low-density lipoprotein cholesterol.

**Supplemental Table S8    Changes of cardiometabolic parameters after 12-week treatment stratified by baseline LDL-c (≥3.12 vs. < 3.12 mmol/L )**

|           | LDL-c≥3.12mmol/L   |               |                           | LDL-c<3.12mmol/L   |               |                           |
|-----------|--------------------|---------------|---------------------------|--------------------|---------------|---------------------------|
|           | Anthocyanins(n=41) | Placebo(n=43) | <i>P<sub>t-test</sub></i> | Anthocyanins(n=39) | Placebo(n=37) | <i>P<sub>t-test</sub></i> |
| HbA1c (%) | -0.27±0.38*        | -0.11±0.23    | 0.026                     | -0.31±0.31         | -0.20±0.25    | 0.097                     |

|                          |              |             |       |             |              |       |
|--------------------------|--------------|-------------|-------|-------------|--------------|-------|
| Fasting glucose(mmol/L)  | 0.04±1.09    | 0.10±0.63   | 0.758 | 0.04±0.79   | 0.20±0.58    | 0.329 |
| 2-h glucose(mmol/L)      | 0.49±2.98    | 0.84±1.95   | 0.523 | 0.97±2.35   | 0.24±2.49    | 0.194 |
| Fasting insulin(μU/ml)   | -0.11±6.08   | -0.08±4.35  | 0.978 | -0.73±3.83  | -0.14±2.68   | 0.438 |
| 2-h insulin(μU/ml)       | 22.60±60.96  | 16.24±45.46 | 0.588 | 10.10±59.33 | 11.29±39.94  | 0.919 |
| Fasting C-Peptide(ng/ml) | 0.05±0.74    | 0.08±0.61   | 0.833 | 0.02±0.65   | 0.00±0.55    | 0.919 |
| 2-h C-Peptide(ng/ml)     | 0.67±2.63    | 0.79±2.35   | 0.815 | 0.40±2.86   | 0.9±2.59     | 0.425 |
| AUC <sub>Glucose</sub>   | 1.12±6.04    | 1.66±4.59   | 0.645 | 2.21±4.64   | 1.69±4.87    | 0.637 |
| AUC <sub>insulin</sub>   | 36.13±139.94 | 18.67±73.49 | 0.473 | 21.00±93.53 | 39.15±101.96 | 0.421 |
| AUC <sub>C-Peptide</sub> | 0.82±6.29    | 0.52±4.17   | 0.795 | 0.65±4.86   | 1.91±6.08    | 0.320 |
| HOMA-IR                  | 0.04±2.09    | 0.05±1.43   | 0.989 | -0.18±1.36  | 0.05±0.96    | 0.404 |
| HOMA-β                   | -11.35±55.47 | -2.84±32.19 | 0.396 | -9.43±30.71 | -15.08±71.83 | 0.654 |
| TC (mmol/L)              | -0.34±1.26   | -0.17±0.77  | 0.455 | 0.10±0.95   | 0.25±0.99    | 0.514 |
| TG (mmol/L)              | 0.26±1.14    | 0.09±0.89   | 0.463 | -0.07±0.88  | 0.19±1.60    | 0.373 |
| HDL-c (mmol/L)           | -0.21±0.37   | -0.16±0.18  | 0.467 | -0.14±0.23  | -0.15±0.25   | 0.796 |
| LDL-c (mmol/L)           | -0.61±0.65*  | -0.27±0.46  | 0.007 | 0.04±0.50   | 0.11±0.54    | 0.593 |
| Apo A-1 (g/L)            | 0.00±0.31    | -0.10±0.22  | 0.093 | 0.02±0.25   | -0.07±0.25   | 0.117 |
| Apo B (g/L)              | -0.14±0.19*  | -0.01±0.17  | 0.001 | -0.02±0.16  | -0.01±0.20   | 0.792 |

Data were presented as mean ± standard deviation. Subgroups were stratified by the dyslipidemia standards in China. \* $P<0.05$  by independent samples *t*-test with comparison of the difference of net changes between the two groups. HOMA-IR, homoeostasis model assessment of insulin resistance; HOMA-β, homoeostasis model assessment of β-cell function; AUC, area under the curve of 3-hour oral glucose tolerance test, were calculated according the trapezoidal rule; TC, Total cholesterol; TG, Triglycerides; HDL-c, high-density lipoprotein cholesterol; LDL-c, low-density lipoprotein cholesterol.

**Supplemental Table S9    Changes of cardiometabolic parameters after 12-week treatment stratified by baseline HOMA-IR ( $\geq 2.89$  vs.  $< 2.89$ )**



|                              | HOMA-IR $\geq$ 2.89 |                    |              | HOMA-IR<2.89       |                   |              |
|------------------------------|---------------------|--------------------|--------------|--------------------|-------------------|--------------|
|                              | Anthocyanins(n=39)  | Placebo(n=41)      | $P_{t-test}$ | Anthocyanins(n=41) | Placebo(n=39)     | $P_{t-test}$ |
| HbA1c (%)                    | -0.37 $\pm$ 0.37*   | -0.17 $\pm$ 0.26   | 0.006        | -0.22 $\pm$ 0.31   | -0.14 $\pm$ 0.23  | 0.225        |
| Fasting glucose(mmol/L)      | 0.00 $\pm$ 0.67     | -0.02 $\pm$ 0.53   | 0.917        | 0.08 $\pm$ 1.16    | 0.32 $\pm$ 0.64   | 0.262        |
| 2-h glucose(mmol/L)          | 0.38 $\pm$ 2.78     | 0.58 $\pm$ 1.77    | 0.703        | 1.05 $\pm$ 2.59    | 0.55 $\pm$ 2.64   | 0.397        |
| Fasting insulin( $\mu$ U/ml) | -0.81 $\pm$ 6.86    | -0.41 $\pm$ 4.32   | 0.758        | -0.04 $\pm$ 2.49   | 0.22 $\pm$ 2.82   | 0.665        |
| 2-h insulin( $\mu$ U/ml)     | 17.08 $\pm$ 77.9    | 23.29 $\pm$ 52.37  | 0.675        | 15.97 $\pm$ 37.06  | 4.12 $\pm$ 26.98  | 0.108        |
| Fasting C-Peptide(ng/ml)     | -0.12 $\pm$ 0.86    | -0.08 $\pm$ 0.67   | 0.831        | 0.18 $\pm$ 0.46    | 0.18 $\pm$ 0.44   | 0.993        |
| 2-h C-Peptide(ng/ml)         | 0.48 $\pm$ 3.21     | 1.31 $\pm$ 2.62    | 0.208        | 0.59 $\pm$ 2.21    | 0.35 $\pm$ 2.19   | 0.633        |
| AUC <sub>Glucose</sub>       | 0.90 $\pm$ 5.80     | 1.17 $\pm$ 4.95    | 0.824        | 2.37 $\pm$ 4.94    | 2.21 $\pm$ 4.40   | 0.881        |
| AUC <sub>insulin</sub>       | 40.25 $\pm$ 155.57  | 43.94 $\pm$ 108    | 0.902        | 17.82 $\pm$ 69.02  | 11.53 $\pm$ 56.63 | 0.658        |
| AUC <sub>C-Peptide</sub>     | 0.91 $\pm$ 6.74     | 1.69 $\pm$ 5.72    | 0.580        | 0.58 $\pm$ 4.33    | 0.61 $\pm$ 4.49   | 0.970        |
| HOMA-IR                      | -0.25 $\pm$ 2.40    | -0.09 $\pm$ 1.41   | 0.710        | 0.11 $\pm$ 0.79    | 0.20 $\pm$ 1.01   | 0.690        |
| HOMA- $\beta$                | -9.81 $\pm$ 48.42   | -11.87 $\pm$ 74.22 | 0.884        | -10.98 $\pm$ 41.79 | -4.97 $\pm$ 16.99 | 0.399        |
| TC (mmol/L)                  | 0.02 $\pm$ 1.06     | 0.23 $\pm$ 0.98    | 0.362        | -0.26 $\pm$ 1.19   | -0.18 $\pm$ 0.74  | 0.750        |
| TG (mmol/L)                  | 0.24 $\pm$ 1.36     | 0.15 $\pm$ 1.02    | 0.748        | -0.04 $\pm$ 0.54   | 0.13 $\pm$ 1.48   | 0.514        |
| HDL-c (mmol/L)               | -0.11 $\pm$ 0.36    | -0.16 $\pm$ 0.22   | 0.461        | -0.23 $\pm$ 0.25   | -0.15 $\pm$ 0.21  | 0.134        |
| LDL-c (mmol/L)               | -0.30 $\pm$ 0.51*   | -0.04 $\pm$ 0.58   | 0.036        | -0.28 $\pm$ 0.79   | -0.15 $\pm$ 0.47  | 0.377        |
| Apo A-1 (g/L)                | 0.01 $\pm$ 0.29     | -0.09 $\pm$ 0.22   | 0.091        | 0.01 $\pm$ 0.26    | -0.08 $\pm$ 0.24  | 0.118        |
| Apo B (g/L)                  | -0.07 $\pm$ 0.16*   | 0.02 $\pm$ 0.21    | 0.024        | -0.08 $\pm$ 0.20   | -0.04 $\pm$ 0.14  | 0.277        |

Data were presented as mean  $\pm$  standard deviation. Subgroups were stratified by the median value. \* $P$ <0.05 by independent samples  $t$ -test with comparison of the difference of net changes between the two groups. HOMA-IR, homoeostasis model assessment of insulin resistance; HOMA- $\beta$ , homoeostasis model assessment of  $\beta$ -cell function; AUC,

area under the curve of 3-hour oral glucose tolerance test, were calculated according the trapezoidal rule; TC, Total cholesterol; TG, Triglycerides; HDL-c, high-density lipoprotein cholesterol; LDL-c, low-density lipoprotein cholesterol.

**Supplemental Table S10 Changes of cardiometabolic parameters after 12-week treatment stratified by baseline HOMA- $\beta$  ( $\geq 89.04$  vs.  $< 89.04$ )**

|                              | HOMA- $\beta \geq 89.04$ |                    |              | HOMA- $\beta < 89.04$ |                   |              |
|------------------------------|--------------------------|--------------------|--------------|-----------------------|-------------------|--------------|
|                              | Anthocyanins(n=41)       | Placebo(n=38)      | $P_{t-test}$ | Anthocyanins(n=39)    | Placebo(n=41)     | $P_{t-test}$ |
| HbA1c (%)                    | -0.31 $\pm$ 0.33*        | -0.12 $\pm$ 0.26   | 0.006        | -0.27 $\pm$ 0.36      | -0.19 $\pm$ 0.22  | 0.234        |
| Fasting glucose(mmol/L)      | 0.36 $\pm$ 0.87*         | 0.02 $\pm$ 0.48    | 0.033        | -0.29 $\pm$ 0.93*     | 0.27 $\pm$ 0.68   | 0.003        |
| 2-h glucose(mmol/L)          | 0.79 $\pm$ 2.81          | 0.82 $\pm$ 1.49    | 0.948        | 0.66 $\pm$ 2.59       | 0.33 $\pm$ 2.74   | 0.578        |
| Fasting insulin( $\mu$ U/ml) | -1.05 $\pm$ 6.72         | 0.04 $\pm$ 4.29    | 0.392        | 0.25 $\pm$ 2.34       | -0.24 $\pm$ 2.97  | 0.409        |
| 2-h insulin( $\mu$ U/ml)     | 23.29 $\pm$ 79.14        | 24.51 $\pm$ 53.83  | 0.936        | 9.38 $\pm$ 28.64      | 3.90 $\pm$ 25.55  | 0.369        |
| Fasting C-Peptide(ng/ml)     | 0.05 $\pm$ 0.90          | -0.03 $\pm$ 0.69   | 0.664        | 0.02 $\pm$ 0.40       | 0.12 $\pm$ 0.46   | 0.312        |
| 2-h C-Peptide(ng/ml)         | 0.87 $\pm$ 3.44          | 1.34 $\pm$ 2.89    | 0.506        | 0.19 $\pm$ 1.68       | 0.37 $\pm$ 1.86   | 0.647        |
| AUC <sub>Glucose</sub>       | 1.70 $\pm$ 5.95          | 1.65 $\pm$ 4.31    | 0.968        | 1.61 $\pm$ 4.82       | 1.70 $\pm$ 5.09   | 0.932        |
| AUC <sub>insulin</sub>       | 46.56 $\pm$ 155.86       | 48.49 $\pm$ 110.14 | 0.949        | 10.04 $\pm$ 56.63     | 8.79 $\pm$ 54.07  | 0.920        |
| AUC <sub>C-Peptide</sub>     | 1.54 $\pm$ 6.87          | 1.98 $\pm$ 6.07    | 0.760        | -0.10 $\pm$ 3.77      | 0.38 $\pm$ 4.01   | 0.580        |
| HOMA-IR                      | -0.15 $\pm$ 2.35         | 0.07 $\pm$ 1.39    | 0.611        | 0.02 $\pm$ 0.80       | 0.03 $\pm$ 1.08   | 0.989        |
| HOMA- $\beta$                | -27.4 $\pm$ 53.79        | -12.05 $\pm$ 76.13 | 0.299        | 7.45 $\pm$ 22.36*     | -5.14 $\pm$ 16.63 | 0.005        |
| TC (mmol/L)                  | 0.10 $\pm$ 1.10          | 0.04 $\pm$ 0.91    | 0.795        | -0.36 $\pm$ 1.13      | 0.01 $\pm$ 0.89   | 0.109        |
| TG (mmol/L)                  | 0.05 $\pm$ 1.25          | 0.36 $\pm$ 1.67    | 0.357        | 0.15 $\pm$ 0.75       | -0.07 $\pm$ 0.62  | 0.169        |
| HDL-c (mmol/L)               | -0.09 $\pm$ 0.37         | -0.17 $\pm$ 0.21   | 0.194        | -0.27 $\pm$ 0.21*     | -0.14 $\pm$ 0.22  | 0.011        |
| LDL-c (mmol/L)               | -0.22 $\pm$ 0.54         | -0.12 $\pm$ 0.52   | 0.404        | -0.36 $\pm$ 0.78      | -0.07 $\pm$ 0.54  | 0.051        |

|               |            |            |       |             |            |       |
|---------------|------------|------------|-------|-------------|------------|-------|
| Apo A-1 (g/L) | 0.06±0.28* | -0.08±0.18 | 0.011 | -0.04±0.27  | -0.09±0.27 | 0.424 |
| Apo B (g/L)   | -0.07±0.17 | -0.02±0.21 | 0.228 | -0.09±0.20* | 0.01±0.16  | 0.029 |

Data were presented as mean ± standard deviation. Subgroups were stratified by the median value. \* $P < 0.05$  by independent samples *t*-test with comparison of the difference of net changes between the two groups. HOMA-IR, homoeostasis model assessment of insulin resistance; HOMA- $\beta$ , homoeostasis model assessment of  $\beta$ -cell function; AUC, area under the curve of 3-hour oral glucose tolerance test, were calculated according the trapezoidal rule; TC, Total cholesterol; TG, Triglycerides; HDL-c, high-density lipoprotein cholesterol; LDL-c, low-density lipoprotein cholesterol.
